# Supplementary material for: Transfontanelle photoacoustic imaging of intraventricular brain hemorrhages in live sheep
Source: PubMed Central journal article supplement — Photoacoustics. 2023 Aug 24;33:100549. doi: 10.1016/j.pacs.2023.100549 (PMC10474607; doi:10.1016/j.pacs.2023.100549), 2023-08-24
Supplement: mmc1.pdf [file mmc1.pdf]

# **Transfontanelle Photoacoustic Imaging of Intraventricular Brain Hemorrhages in Live Sheep**

**Juliana Bnevaides-Lara<sup>1</sup>, Rayyan Manwar<sup>1</sup>, Laura S McGuire<sup>2</sup>, Md. Tarikul Islam<sup>1</sup>, Anthony Shoo<sup>3</sup>, Fady T Charbel<sup>2</sup>, Martha G Menchaca<sup>3</sup>, Amanda P Siegel<sup>1</sup>, De-Ann M Pillers<sup>3</sup>, Juri Gelovani<sup>4,5,6</sup>, Kamran Avanaki<sup>1,3,7,\*</sup>**

<sup>1</sup> *Richard and Loan Hill Department of Bioengineering, University of Illinois at Chicago, Chicago, Illinois, United States*

<sup>2</sup> *Department of Neurological Surgery, University of Illinois at Chicago – College of Medicine, Chicago, Illinois, United States*

<sup>3</sup> *Section of Neonatology, Department of Pediatrics, UIHealth Children’s Hospital of the University of Illinois at Chicago, Chicago, Illinois, United States*

<sup>4</sup> *College of Medicine and Health Sciences, United Arab Emirates University, Al Ain, Abu Dhabi, UAE*

<sup>5</sup> *Department of Biomedical Engineering, College of Engineering and School of Medicine, Wayne State University, Detroit, MI 48201, USA*

<sup>6</sup> *Dept. Radiology, Siriraj Hospital, Mahidol University, Bangkok, 10700, Thailand*

<sup>7</sup> *Department of Dermatology, University of Illinois at Chicago, Chicago, Illinois, United States*

**\*Corresponding Author: Kamran Avanaki**

**Phone: +1 (312) 413-5528**

**E-mail: avanaki@uic.edu**

# Supplementary Material

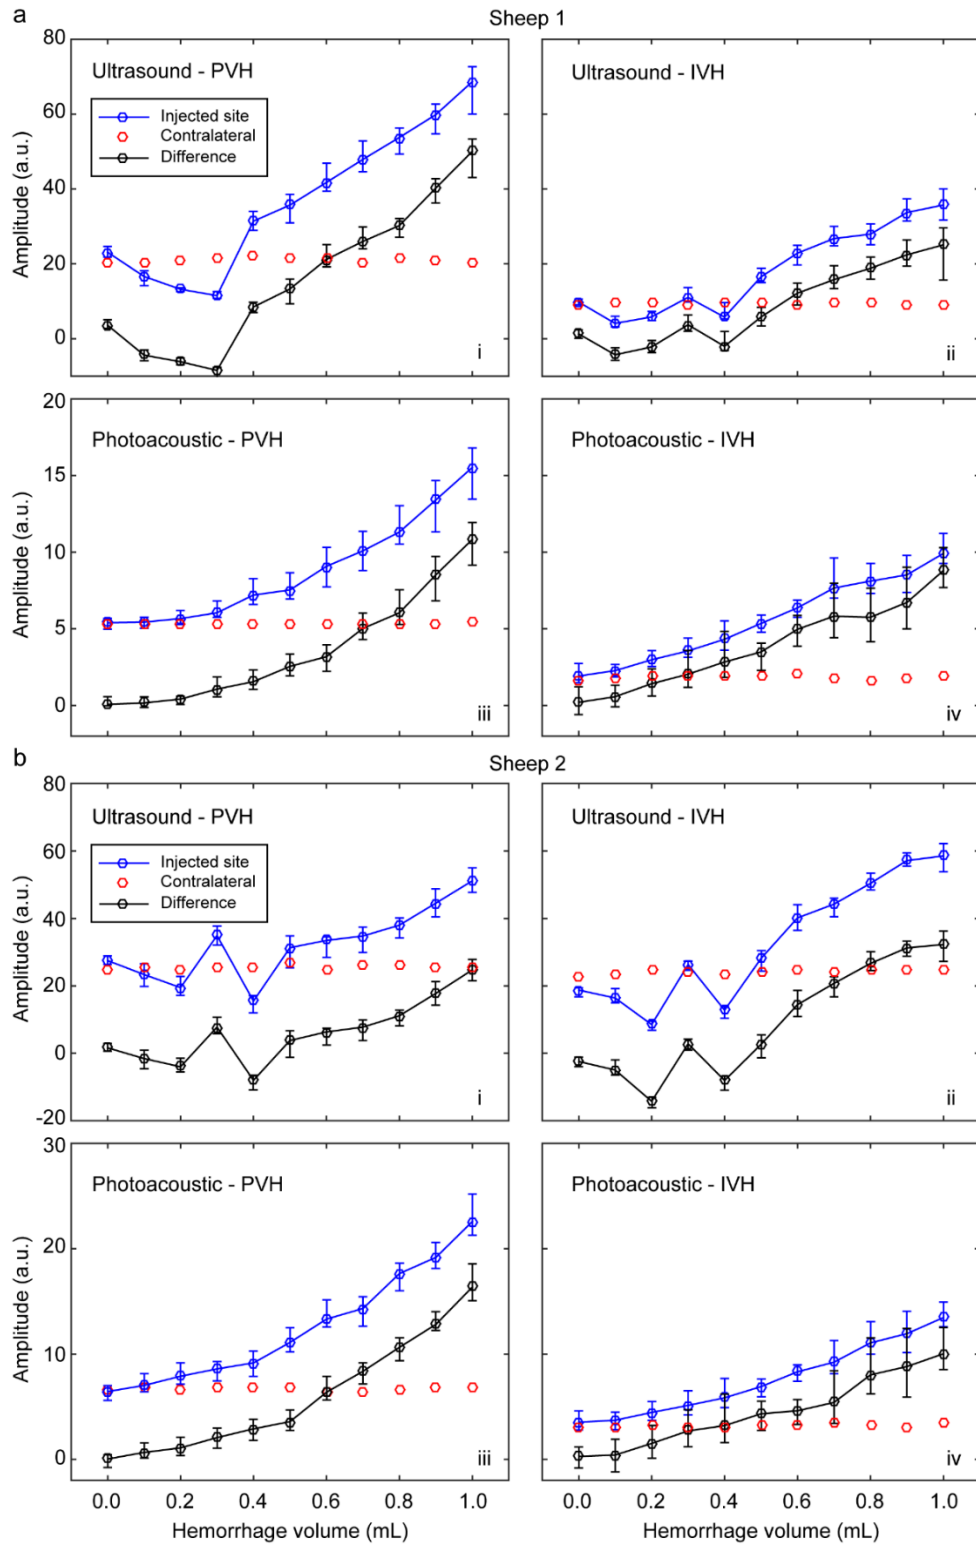

**Figure S1.** Pixel values of the injected ROI<sub>i</sub> in Sheep #1 (a) and Sheep #2 (b) for different injection volumes are shown in blue (mean and range). Median results for contralateral region (ROI<sub>c</sub>) are shown in red. Difference between ROI<sub>i</sub> and median ROI<sub>c</sub> are shown for the injection volumes in black (mean and range). Results are shown for ultrasound and photoacoustic analyses for both PVH and IVH models. ROI: region of interest; IVH: intraventricular hemorrhage; PVH: periventricular hemorrhage.
